# Supplementary material for: Heat-Induced Gelation of Chickpea and Faba Bean Flour Ingredients
Source: MDPI journal article supplement (doi:10.3390/gels10050309), 2024-05-01
Supplement: s1 [file s1]

pH 3.0

Temperature Sweep

Frequency Sweep

Strain Sweep

10%

FB

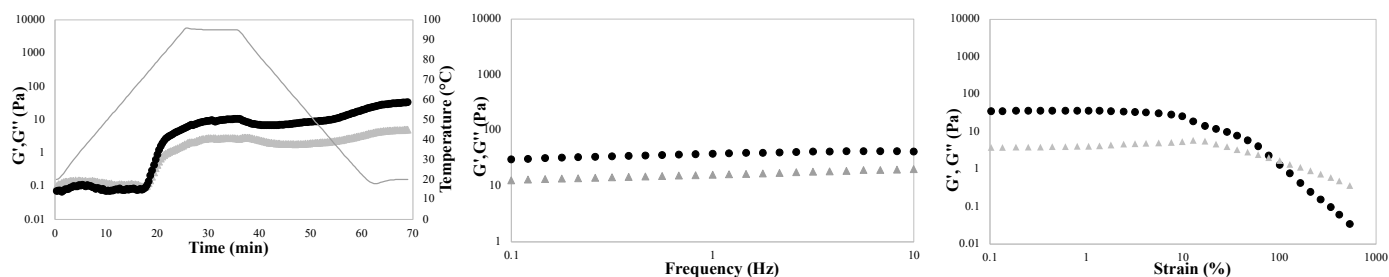

CP

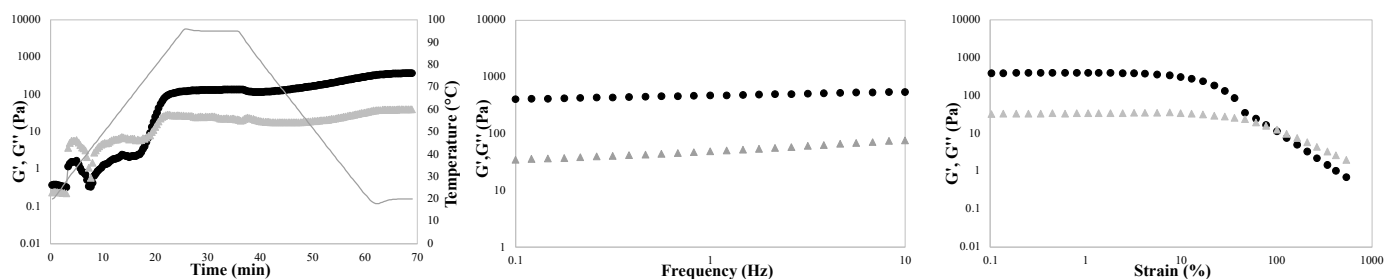

14%

FB

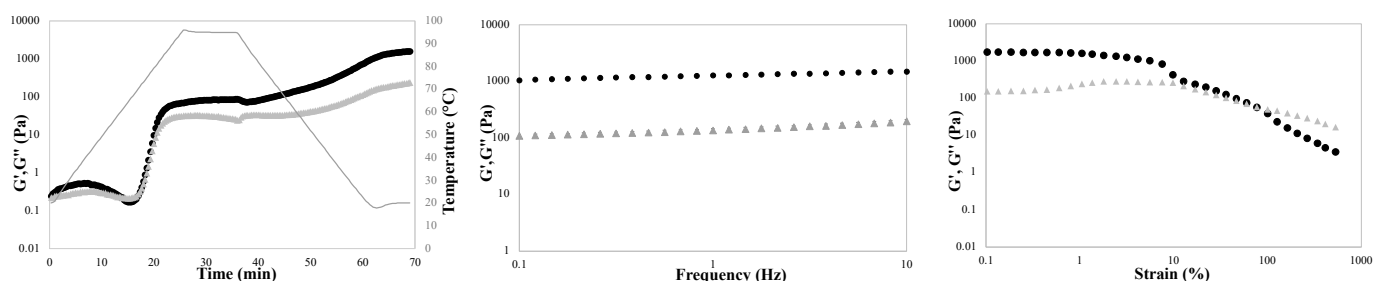

CP

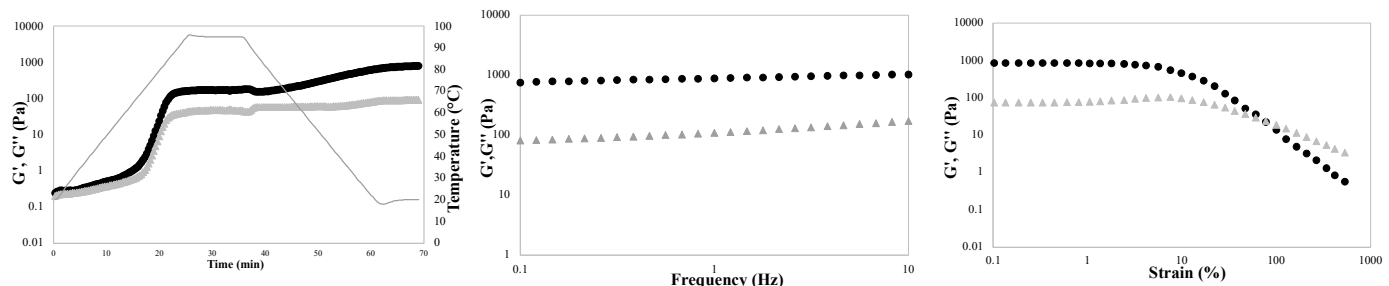

pH 5.0

Temperature Sweep

Frequency Sweep

Strain Sweep

10%

FB

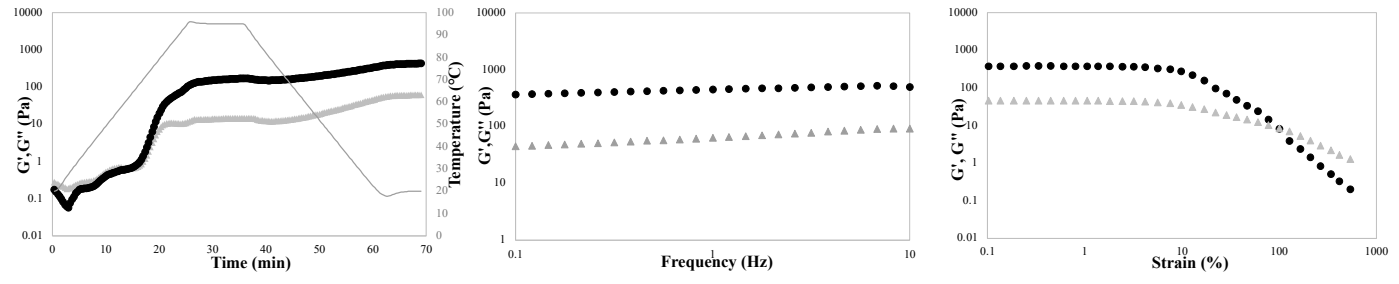

CP

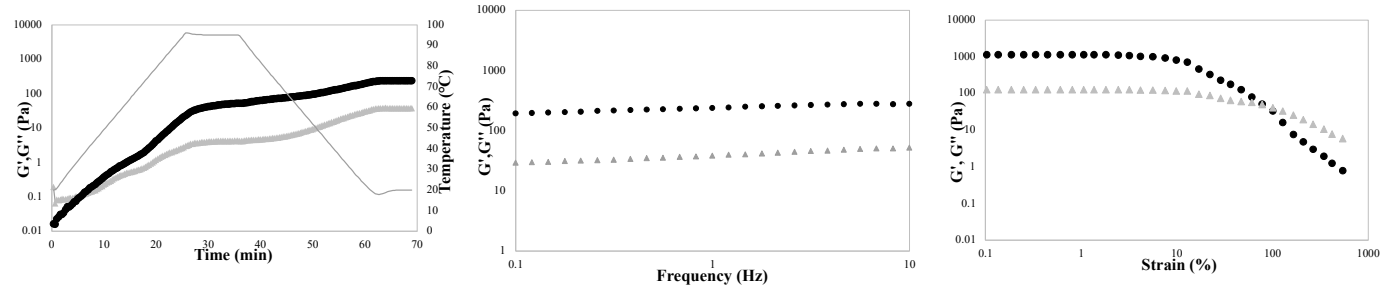

14%

FB

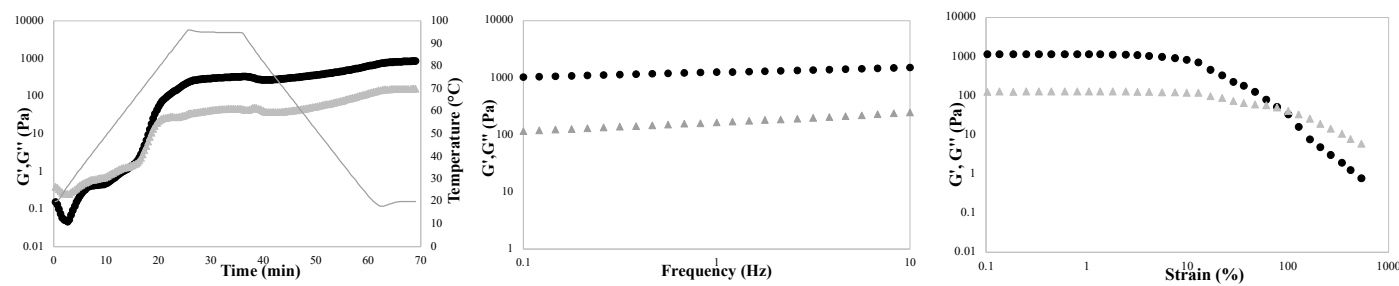

CP

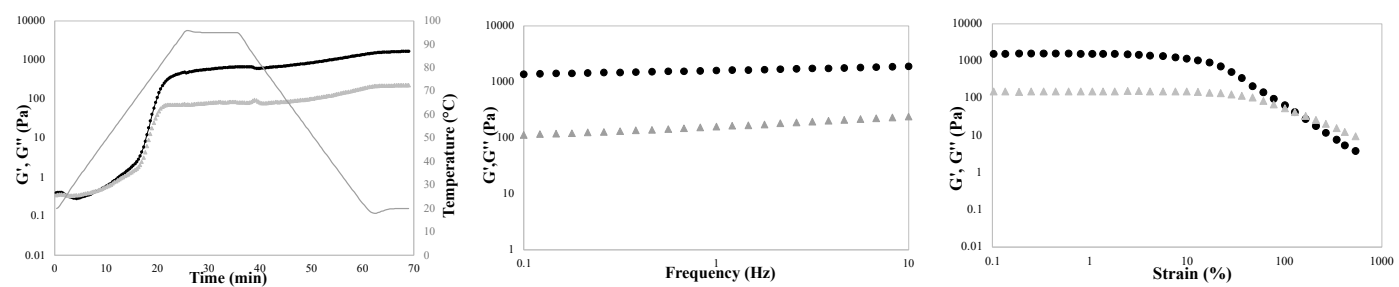

pH 7.0

Temperature Sweep

Frequency Sweep

Strain Sweep

14%

FB

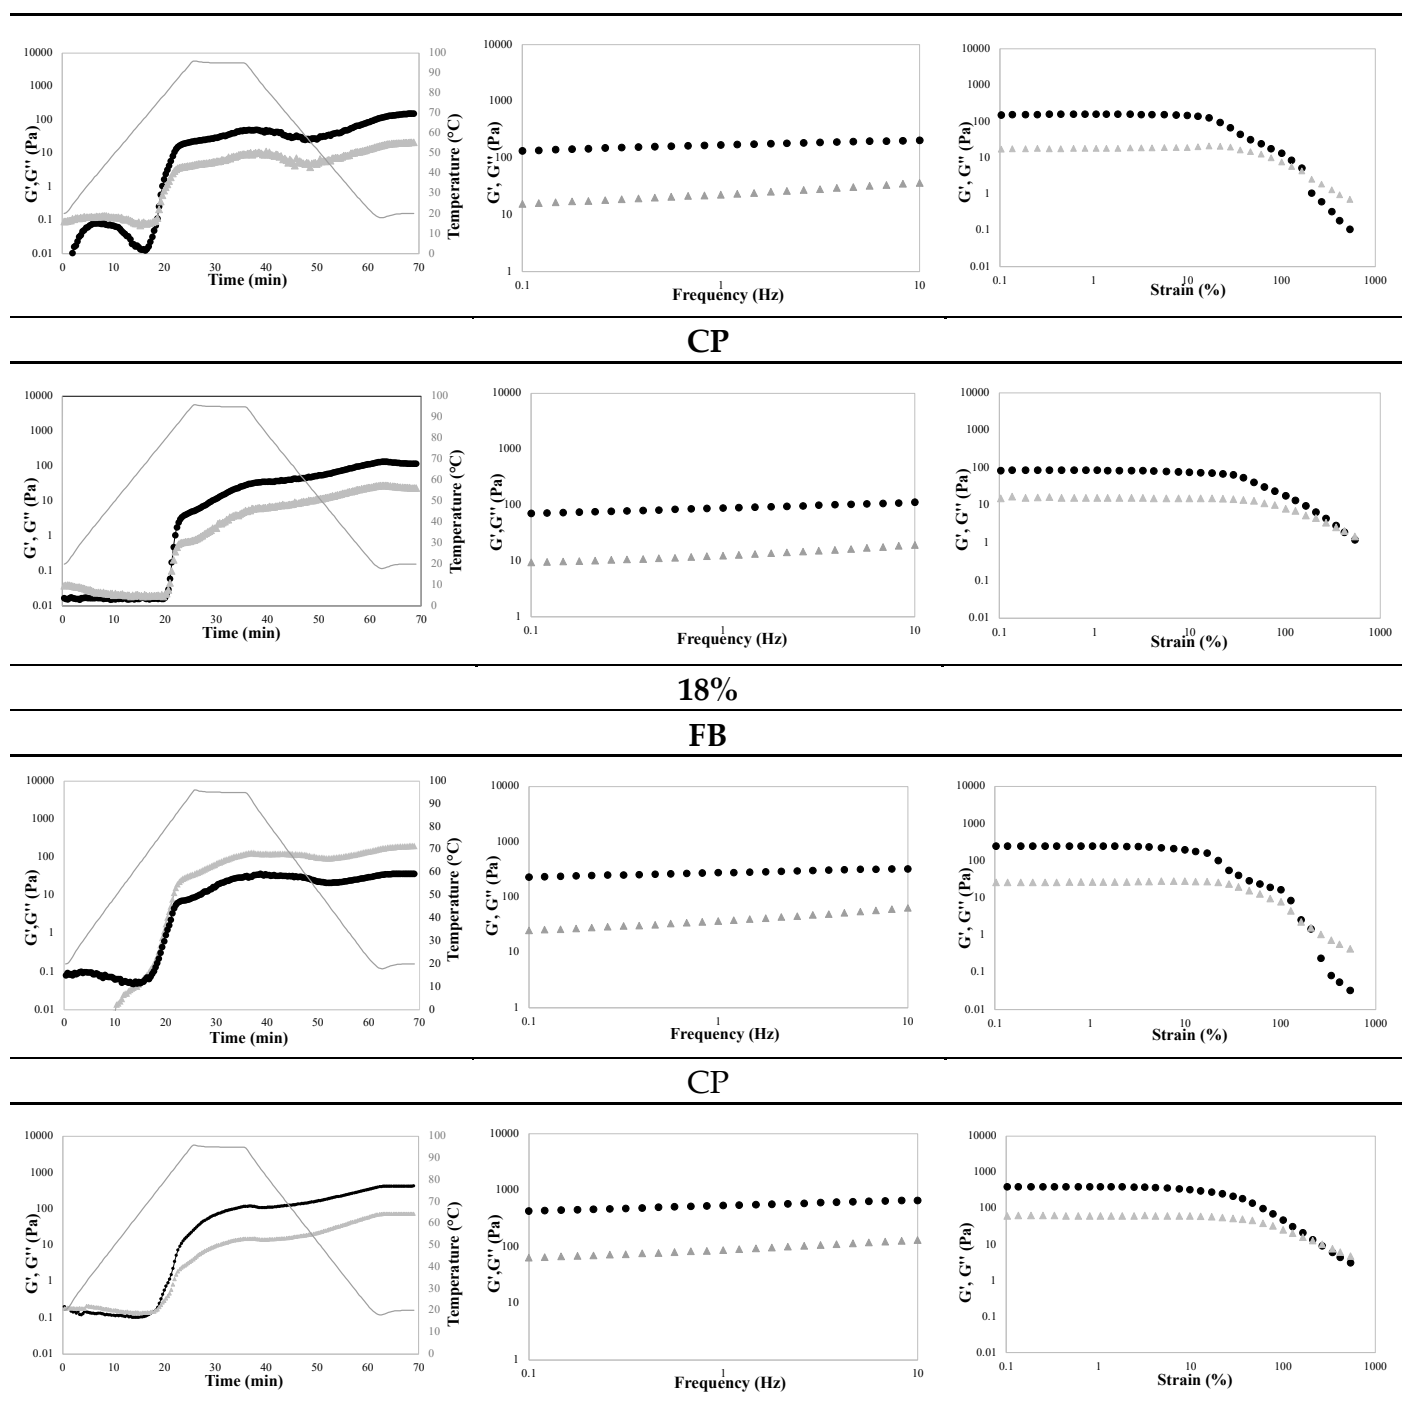

**Figure S1.** Temperature, frequency, and strain amplitude sweeps of faba bean (FB) and chickpea (CP) gels at 10 and 14% for pH 3.0 and 5.0, and 14, and 18% at pH 7.0. (excluding the MGC).  $G'$ : black point symbols,  $G''$ : grey triangle symbols.
